# Supplementary material for: ZBTB7A mutations in acute myeloid leukaemia with t(8;21) translocation
Source: PubMed Central journal article supplement (PMC4895769; doi:10.1038/ncomms11733), 2016-06-02
Supplement: ncomms11733-s1.pdf [file ncomms11733-s1.pdf]

UPN#1-Diagnosis: NM\_015898:exon2: c.1205G>A:p.R402H

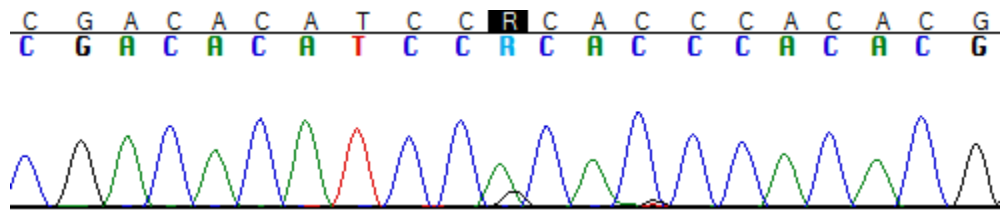

UPN#1-Remission: Wild-type

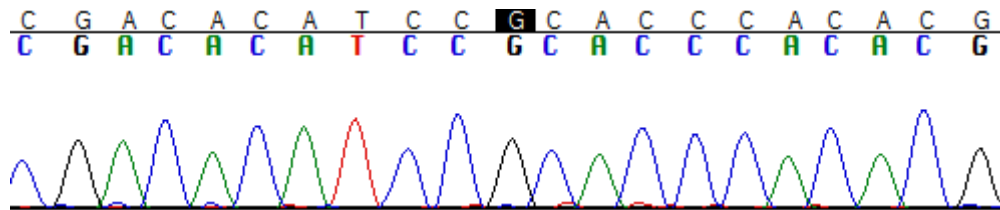

UPN#2-Diagnosis: NM\_015898:exon2: c.522dupC:p.A175fs

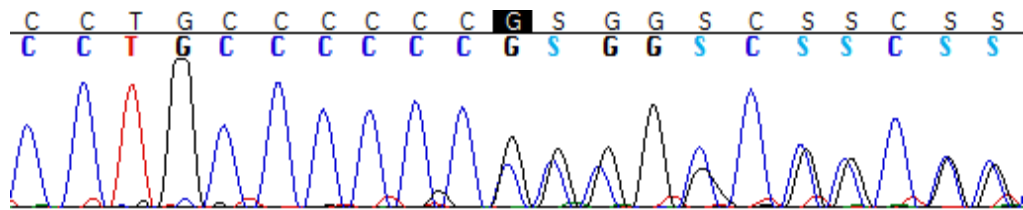

UPN#2-Remission: Wild-type

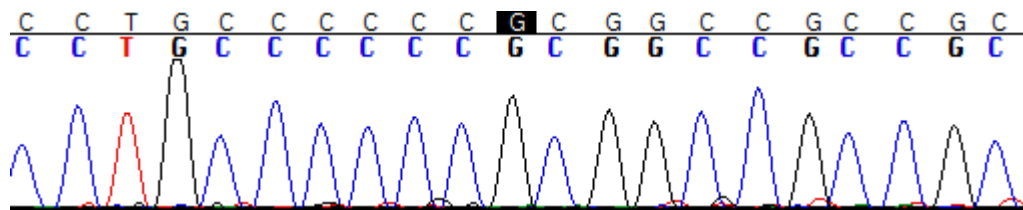

**Supplementary Figure 1.** Sanger sequencing confirms *ZBTB7A* mutations.

UPN#3-Diagnosis: NM\_015898:exon2: c.1204C>T:p.R402C

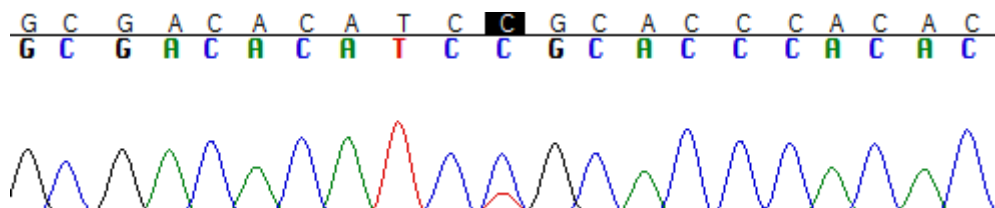

UPN#3-Diagnosis: NM\_015898:exon2: c.522dupC:p.A175fs

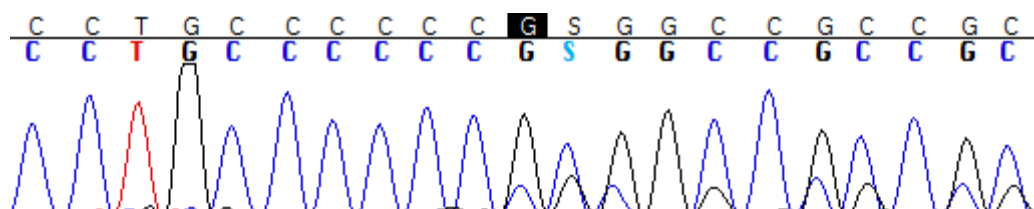

UPN#4-Diagnosis: NM\_015898:exon2: c.149C>T:p.S50L

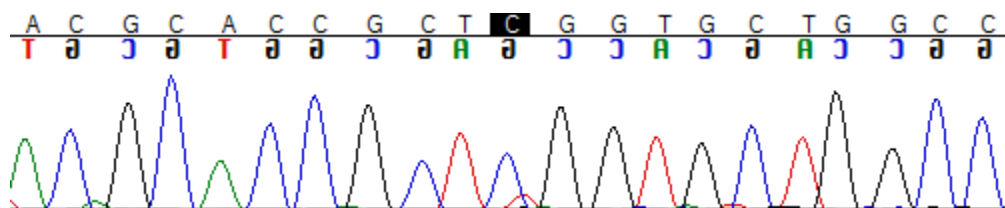

UPN#5-Diagnosis: NM\_015898:exon2: c.1089\_1090insTAA: p.V364delinsX

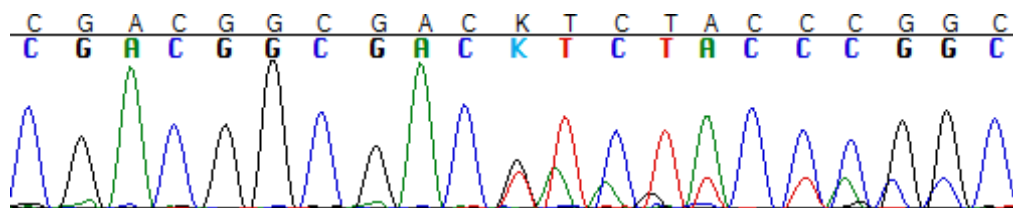

**Supplementary Figure 1 (continued).** Sanger sequencing confirms *ZBTB7A* mutations.

UPN#5-Diagnosis: NM\_015898:exon2: c.146G>A:p.R49H

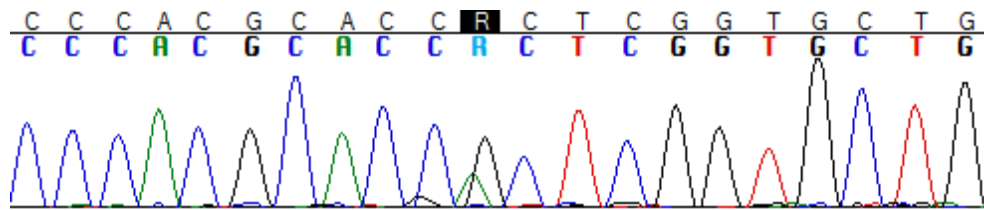

UPN#6-Diagnosis: NM\_015898:exon2: c.1183G>T:p.G395C

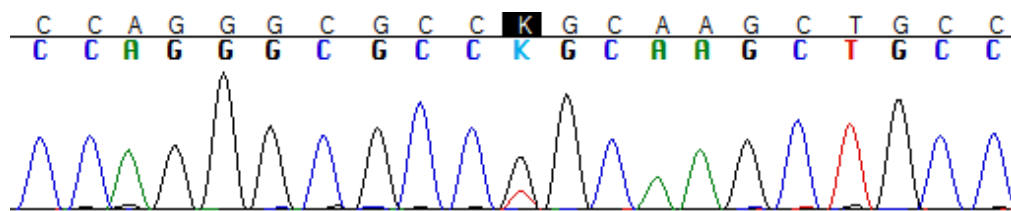

UPN#7-Diagnosis: NM\_015898:exon2: c.1204C>T:p.R402C

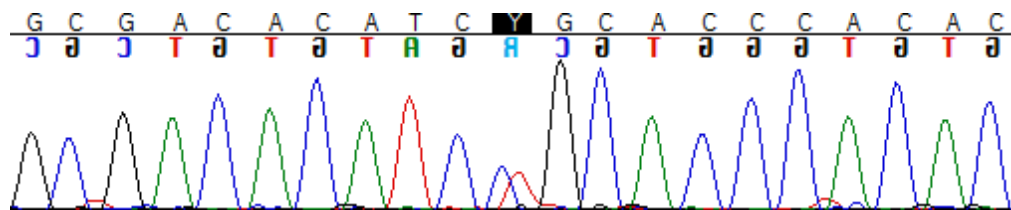

UPN#8-Diagnosis: NM\_015898:exon2: c.522dupC:p.A175fs

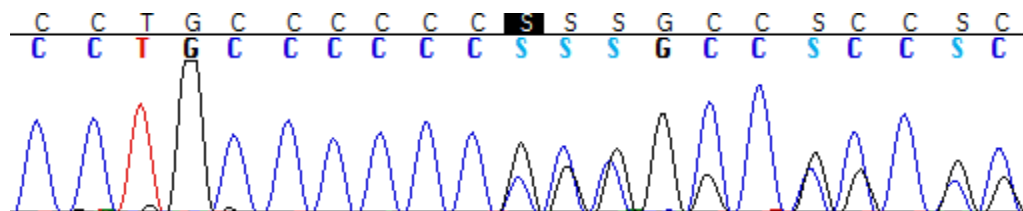

**Supplementary Figure 1 (continued).** Sanger sequencing confirms *ZBTB7A* mutations.

UPN#9-Diagnosis: NM\_015898:exon2: c.1129C>T:p.R377X

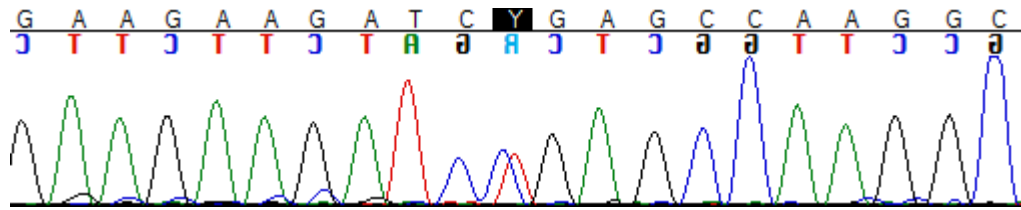

UPN#11-Diagnosis: NM\_015898:exon2: c.237C>A:p.F79L

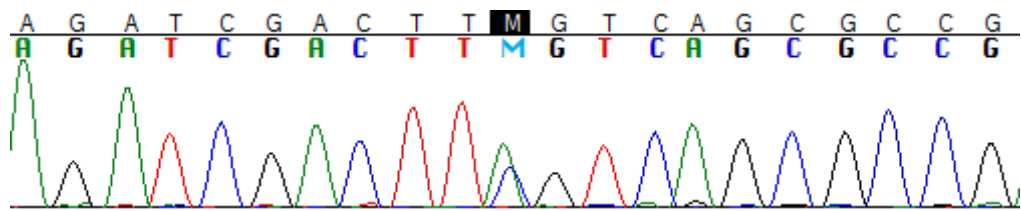

UPN#12-Diagnosis: NM\_015898:exon2: c.522dupC:p.A175fs

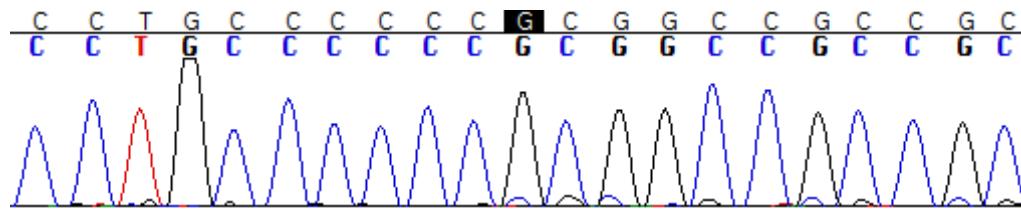

UPN#13-Diagnosis: NM\_015898:exon2: c.254T>G:p.L85R

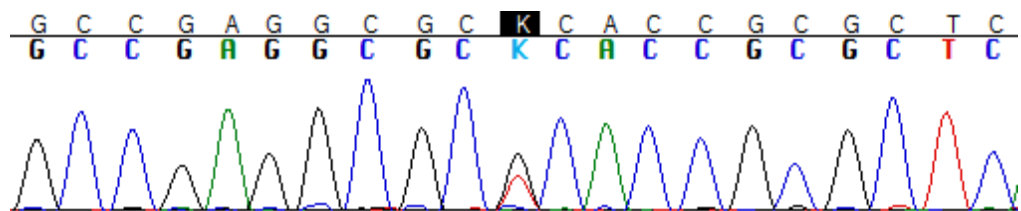

**Supplementary Figure 1 (continued).** Sanger sequencing confirms *ZBTB7A* mutations.

UPN#14-Diagnosis: NM\_015898:exon2: c.522dupC:p.A175fs

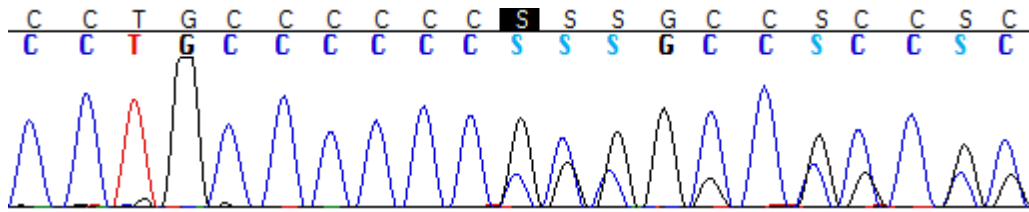

**Supplementary Figure 1 (continued).** Sanger sequencing confirms *ZBTB7A* mutations.

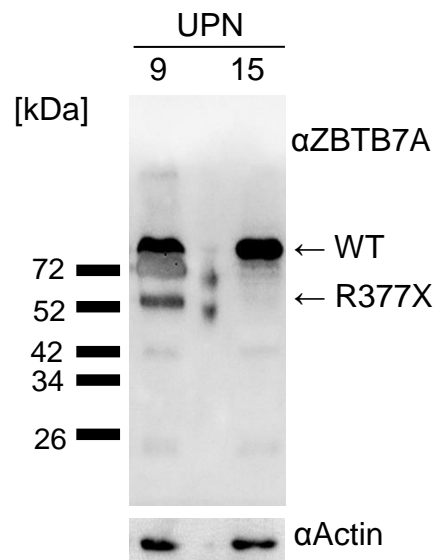

**Supplementary Figure 2.** Western blot analysis of a patient with the truncating R377X mutation (UPN9) and another patient with wild-type ZBTB7A (UPN15).

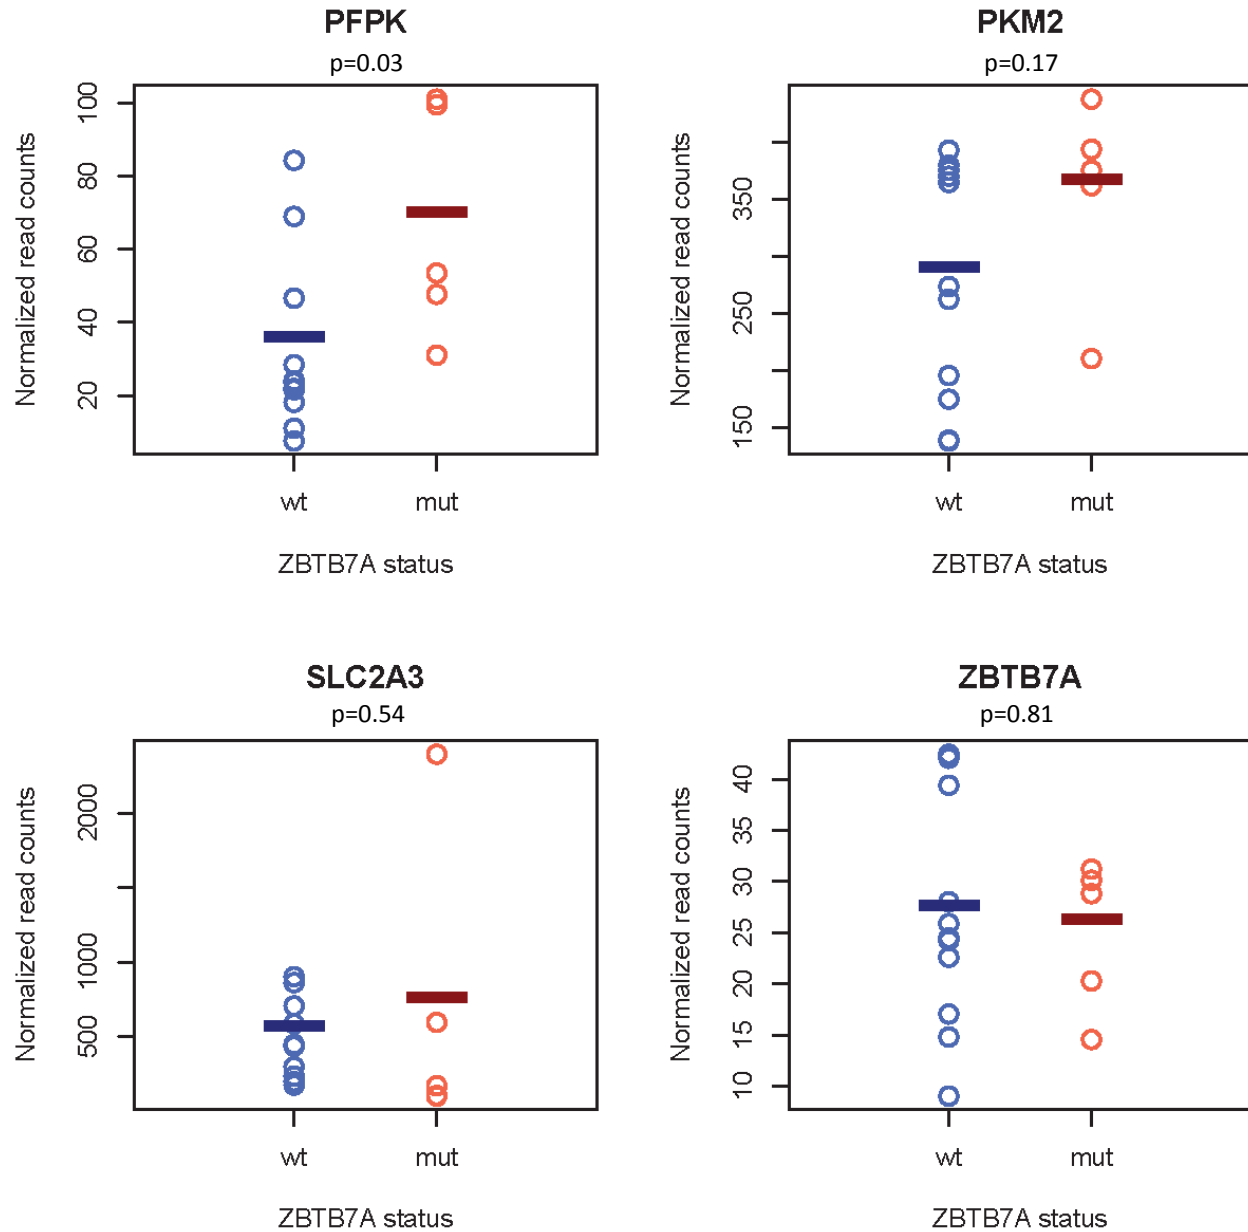

**Supplementary Figure 3.** Expression of glycolytic genes and *ZBTB7A* in AML t(8;21) patients according to *ZBTB7A* mutation status. Circles indicate mRNA sequence read counts from individual patients. Horizontal bars show mean values of the two patient groups (mutated n=5; wild-type n=11). Differences between groups were assessed using a two-tailed unpaired Student's t-test.

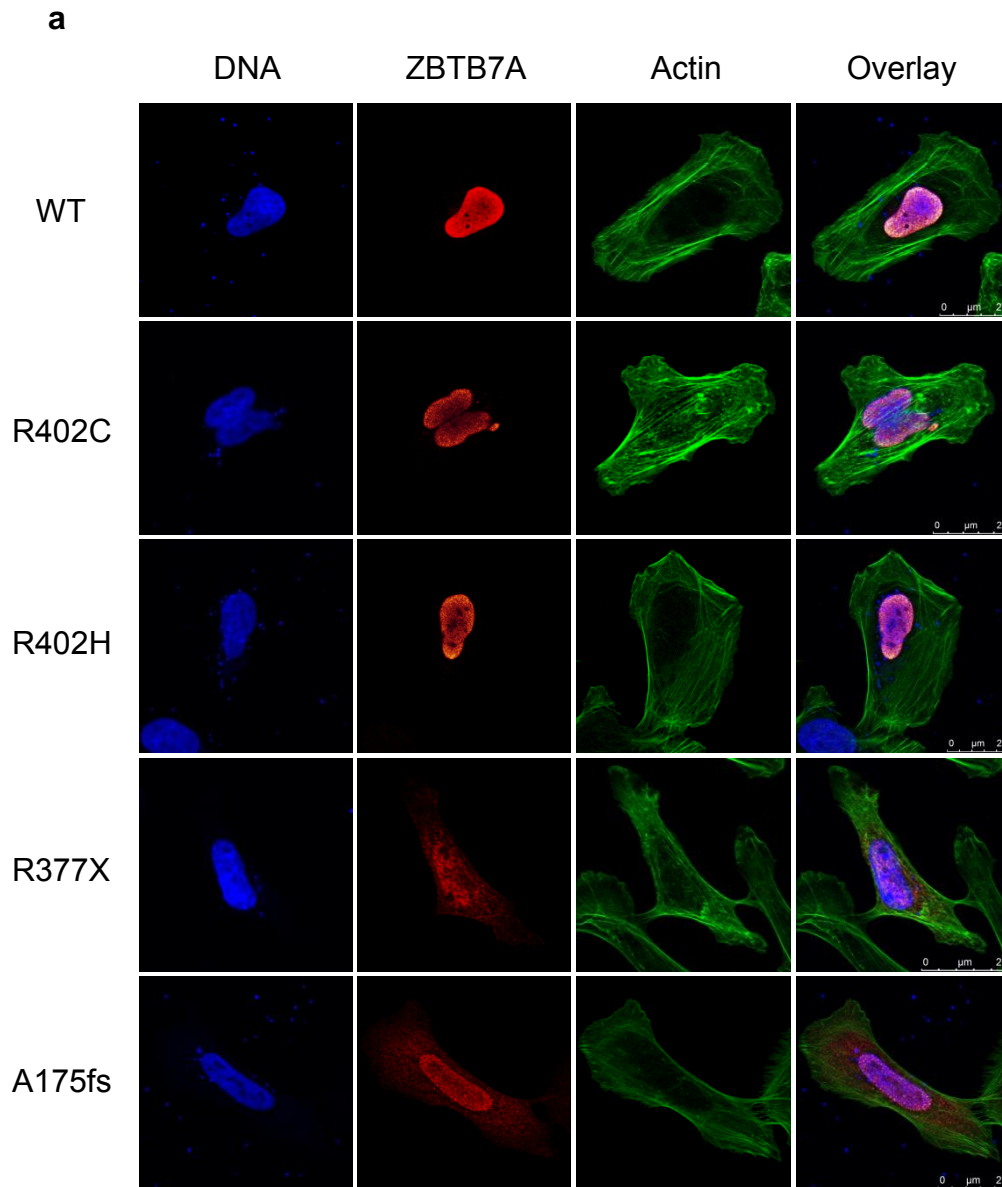

**Supplementary Figure 4.** Subcellular localization of ZBTB7A wild-type and mutants. (a) Representative confocal laser scans of transiently transfected U2OS cells show the predominant protein distribution observed for each construct. Scale bar corresponds to 25  $\mu\text{m}$ .



**b**

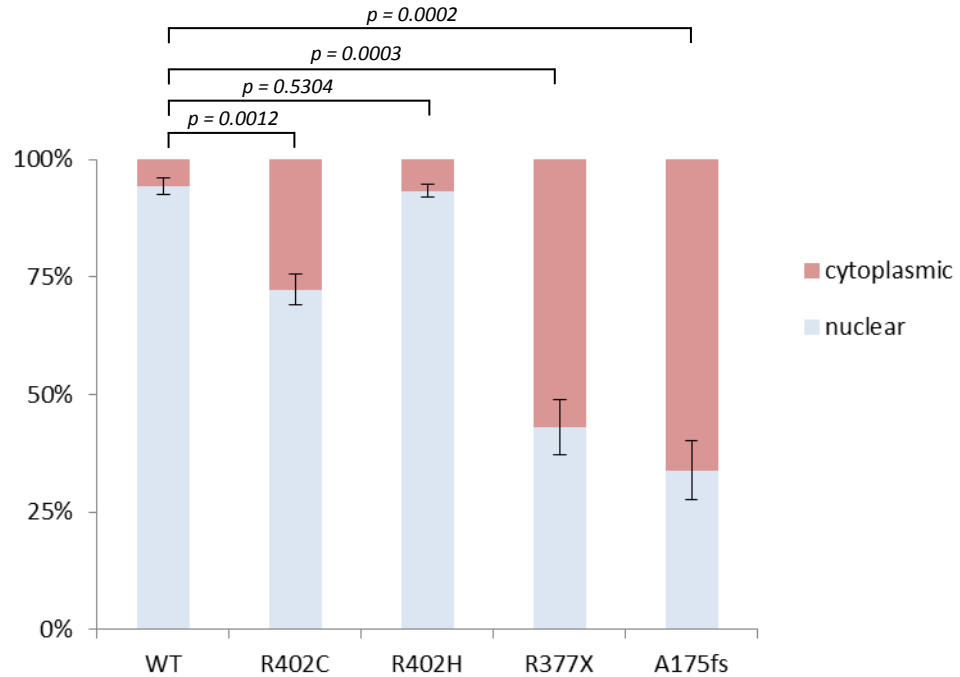

**Supplementary Figure 4 (continued).** (b) Cell counts after immunofluorescence staining of ZBTB7A wild-type and mutants in transiently transfected U2OS cells. Bar graph shows mean values  $\pm$  standard deviation of 3 independent experiments with evaluation of 124 cells per construct (representing the minimum number of cells available for evaluation in each experiment). Statistical difference was assessed using a two-tailed unpaired Student's t-test. Nuclear localization was defined as detection of ZBTB7A exclusively in the cell nucleus, whereas cytoplasmic localization indicates ZBTB7A protein detected both in the nucleus and the cytoplasm.

c

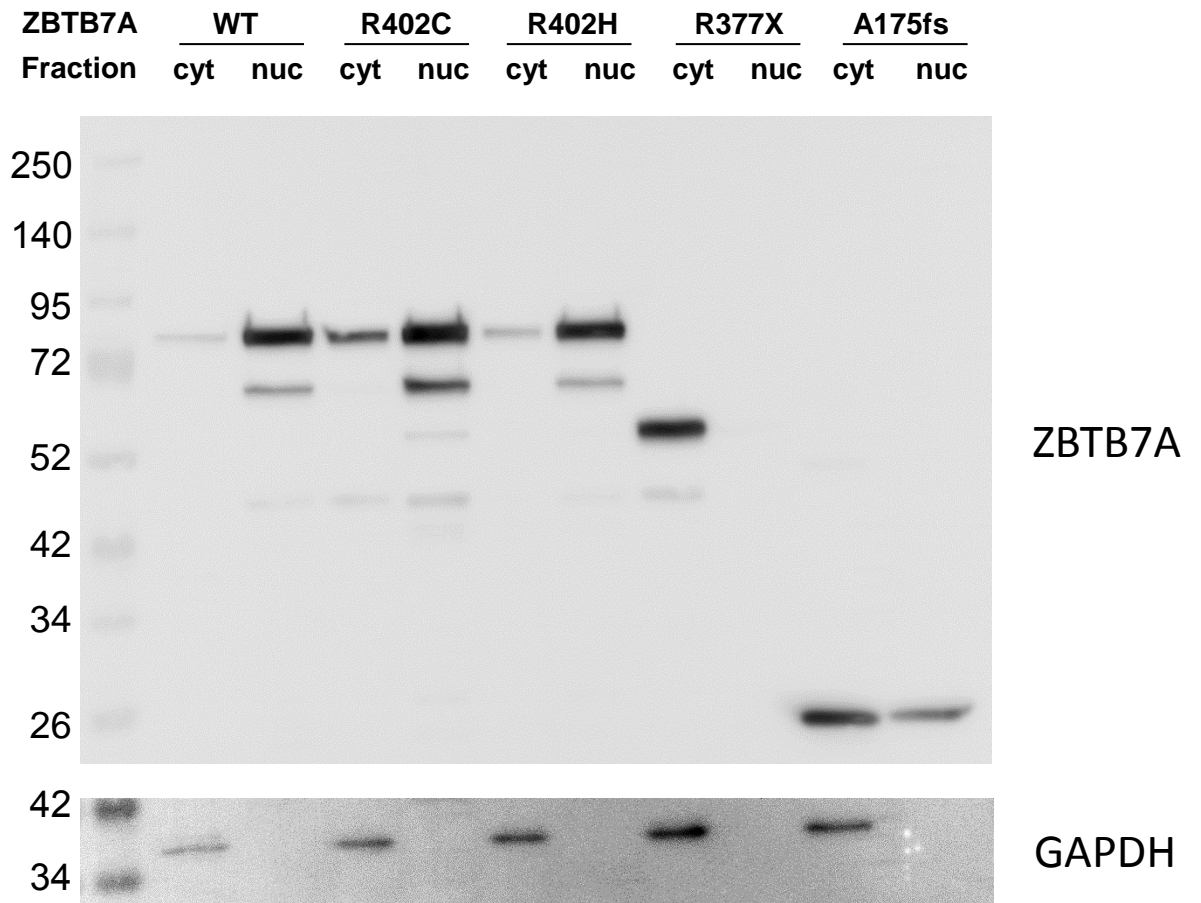

**Supplementary Figure 4 (continued).** (c) Western blot analysis of cytoplasmic (cyt) and nuclear (nuc) protein fractions extracted from HEK293T cells expressing ZBTB7A wild-type or mutants.

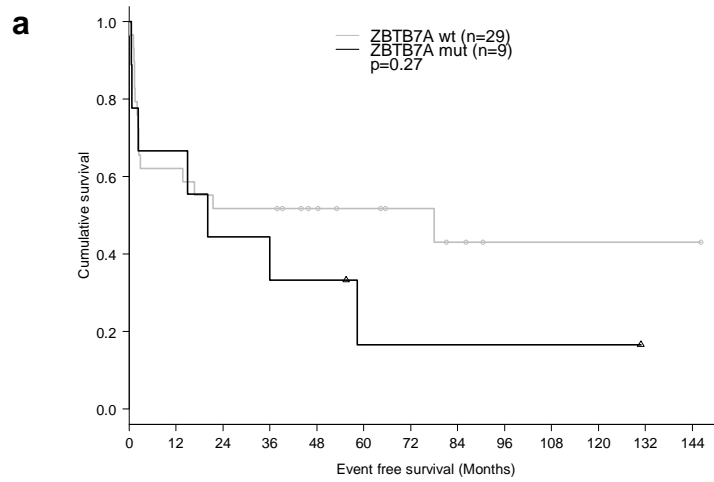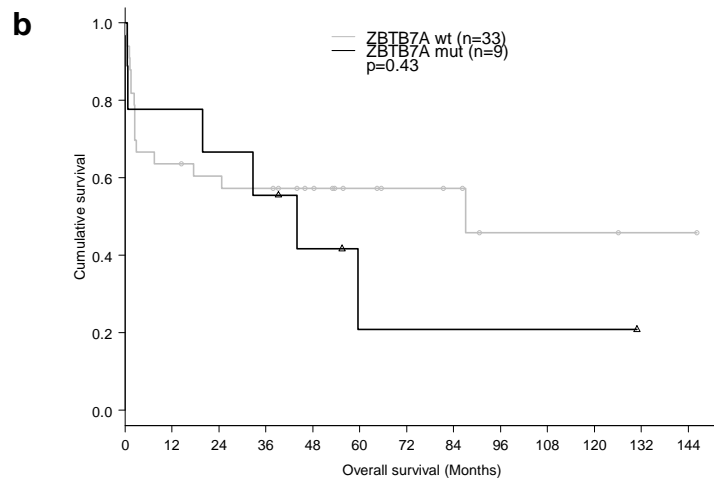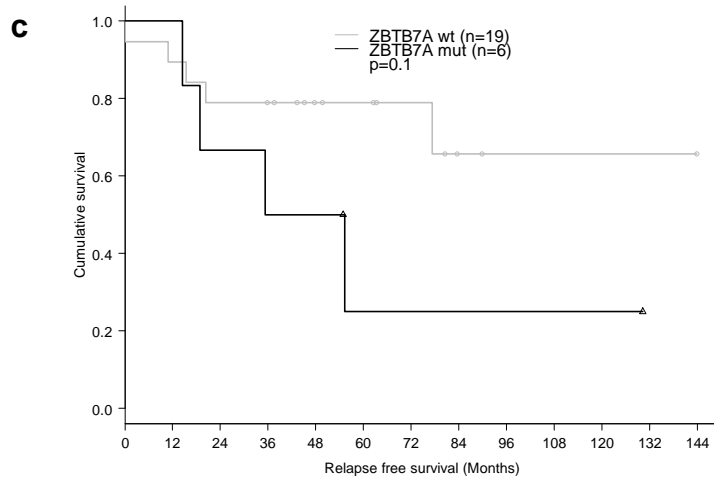

**Supplementary Figure 5.** Survival of t(8;21) positive AML patients according to *ZBTB7A* mutation status. P values were calculated by the log-rank test. (a) Event free survival, (b) Overall survival and (c) Relapse-free survival.

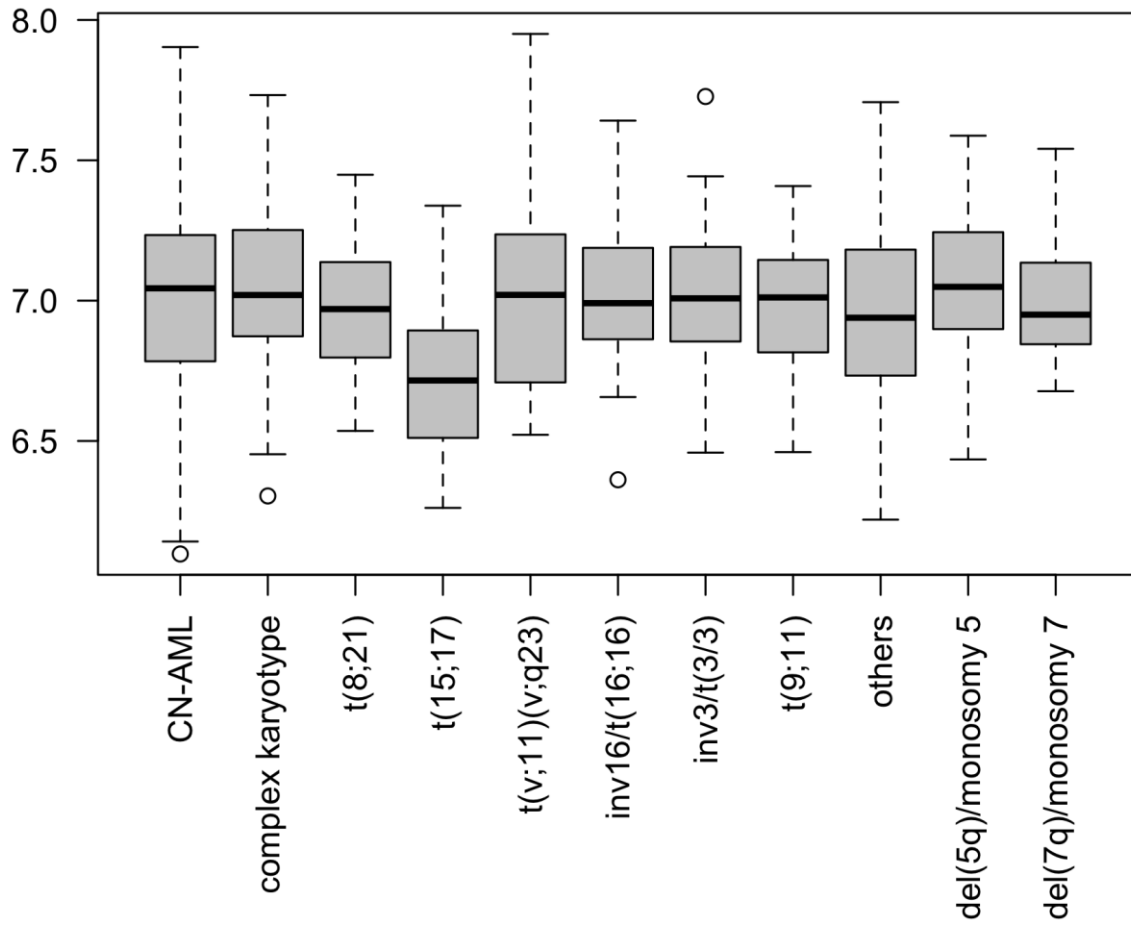

**Supplementary Figure 6.** *ZBTB7A* expression in cytogenetic subgroups of AML.

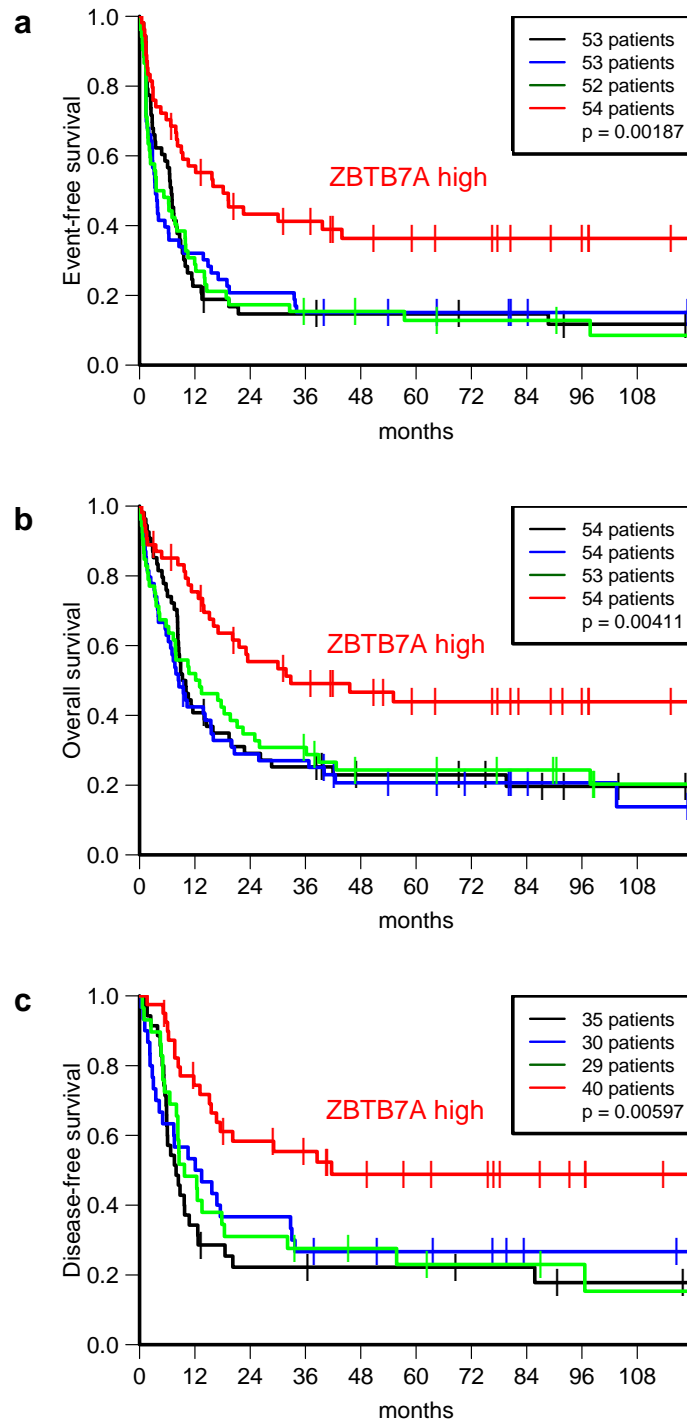

**Supplementary Figure 7.** Survival of patients with cytogenetically normal (CN-)AML according to *ZBTB7A* expression (GSE37642). High *ZBTB7A* expression (red) was defined as the highest (4<sup>th</sup>) quartile of expression values observed in CN-AML patients. Patients with *ZBTB7A* expression levels in the 1<sup>st</sup> to 3<sup>rd</sup> quartile were classified as having low expression. P values were calculated by the log-rank test. (a) Event-free survival (b) Overall survival (c) Relapse-free survival.

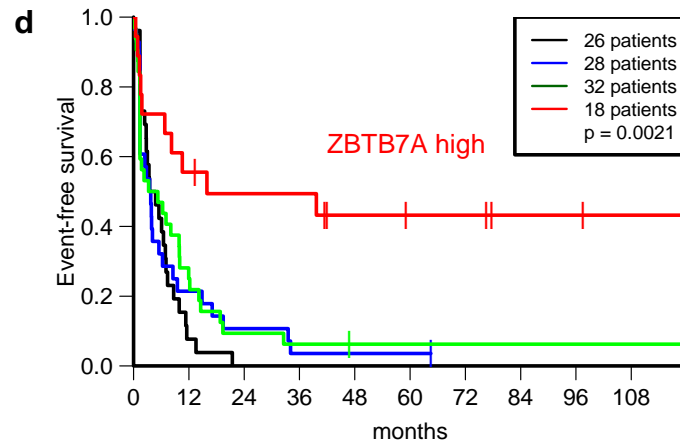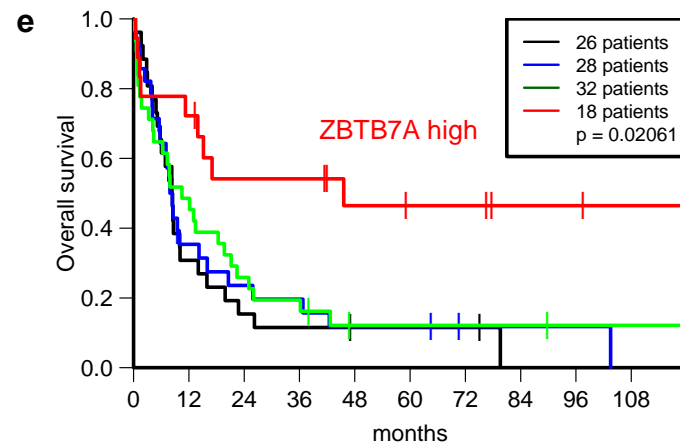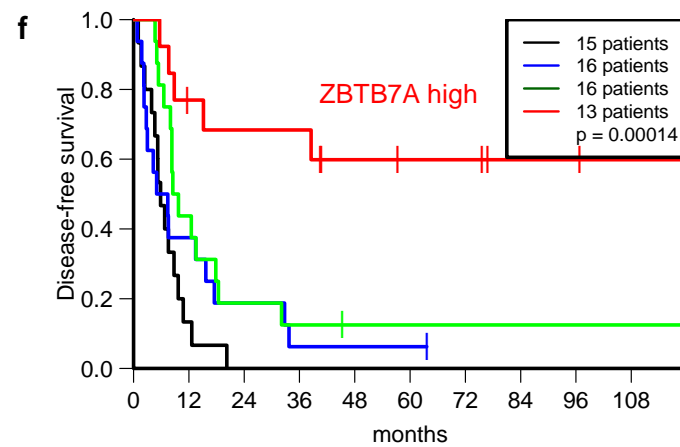

**Supplementary Figure 7 (continued).** Survival of patients  $\geq 60$  years with CN-AML according to *ZBTB7A* expression (GSE37642). (d) Event-free survival patients (e) Overall survival (f) Relapse-free survival.

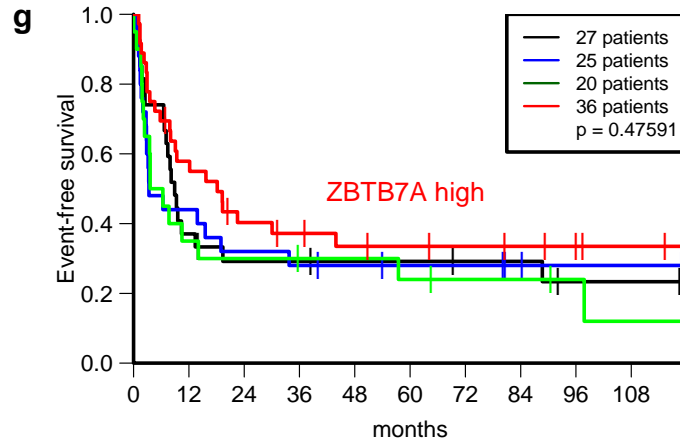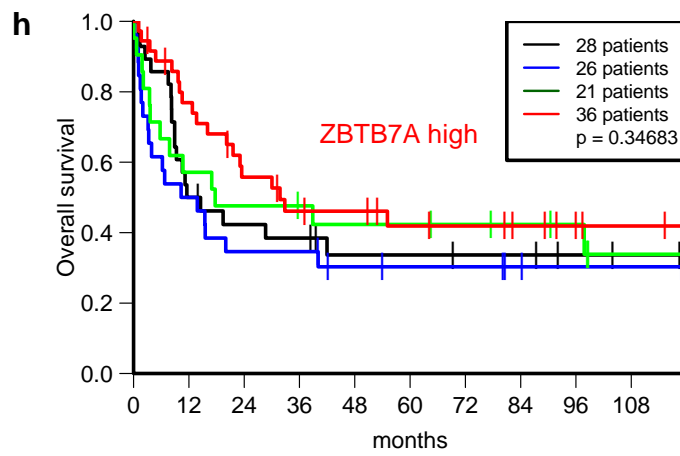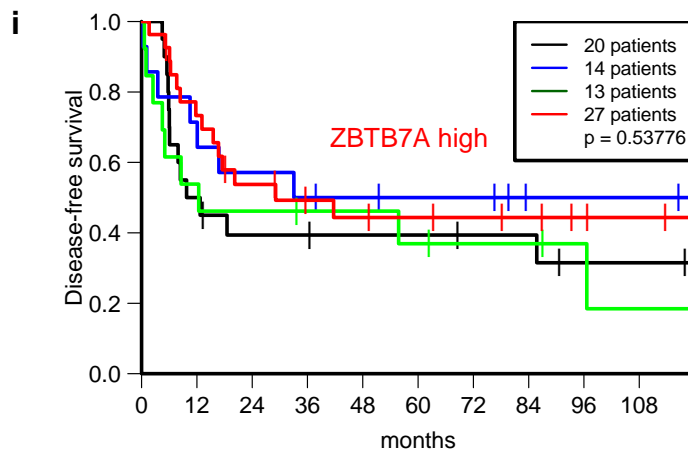

**Supplementary Figure 7 (continued).** Survival of patients < 60 years with CN-AML according to *ZBTB7A* expression (GSE37642). (g) Event-free survival patients (h) Overall survival (i) Relapse-free survival.

AMLCG CN-AML cohort, Q1-3 vs Q4

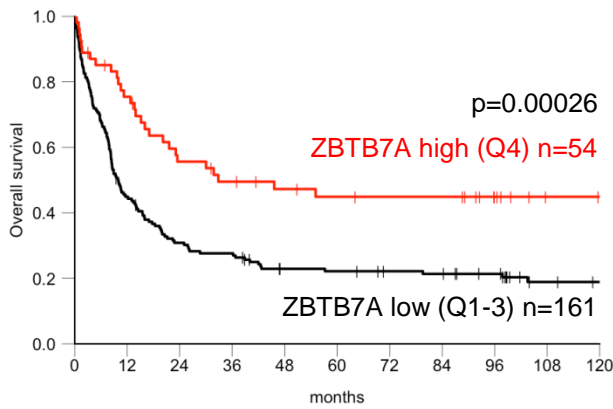

OS AMLCG CN-AML cohort, median cut

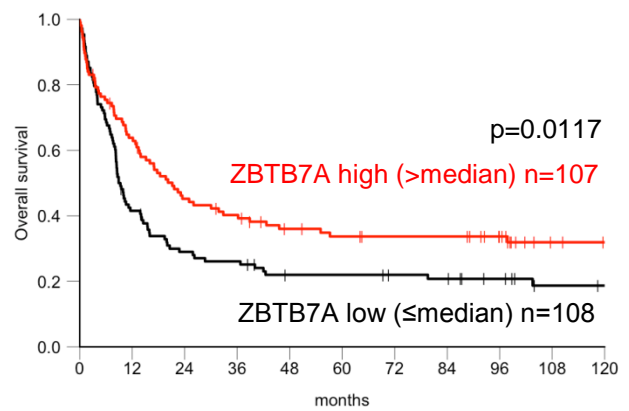

HOVON CN-AML cohort, Q1-3 vs Q4

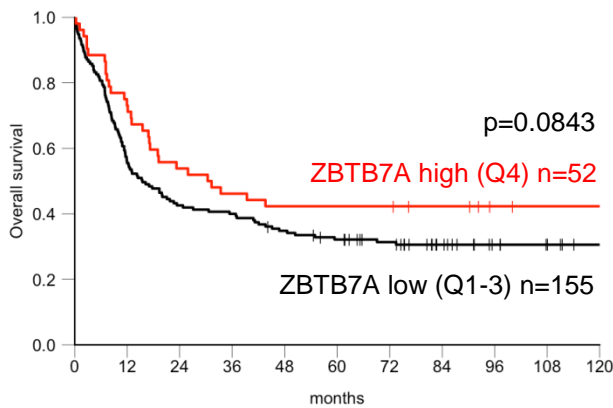

HOVON CN-AML cohort, median cut

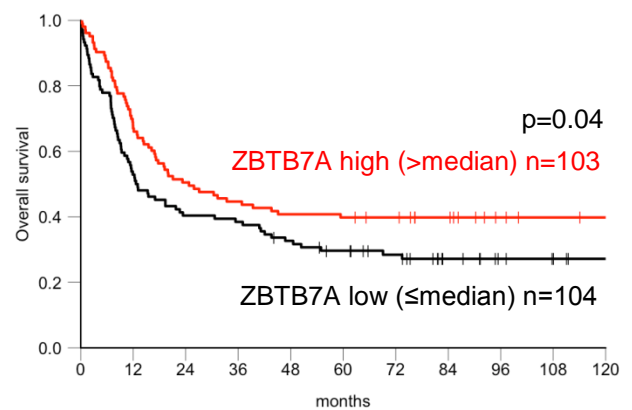

**Supplementary Figure 8.** Overall survival of patients with CN-AML according to *ZBTB7A* expression in the AMLCG-cohort (GSE37642) and the HOVON cohort (GSE14468 and GSE1159). P values were calculated by the log-rank test.



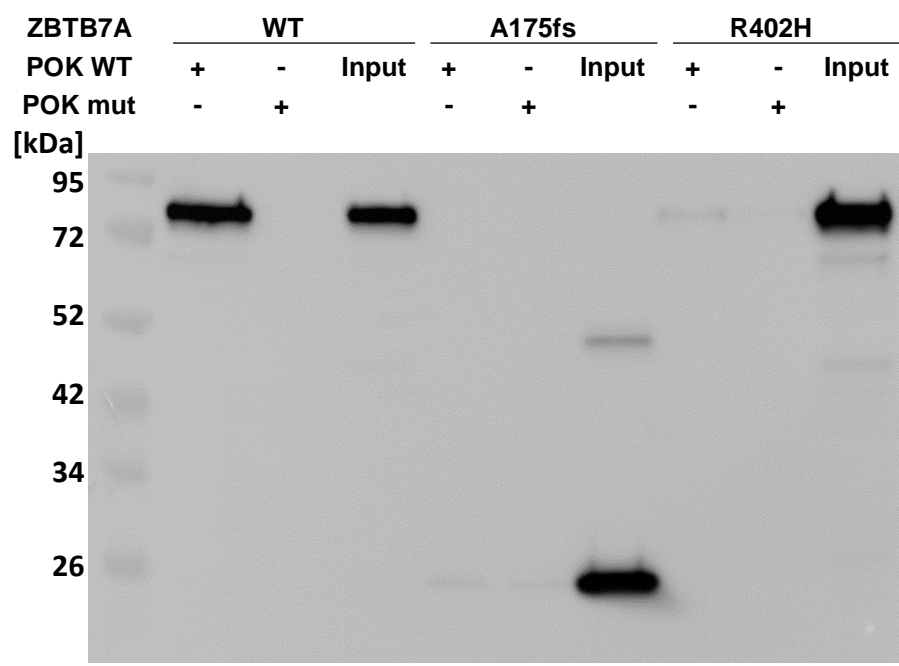

**Supplementary Figure 9.** Uncropped Western blot scan underlying Figure 2c.

**Supplementary Table 1.** Somatic variants from exome sequencing of two AML t(8;21) patients.

| UPN | Chr | Position (hg 19) | Gene     | Ref | Var    | dbSNP                   | VarFreq (%) | Type                 | AA Change                               |
|-----|-----|------------------|----------|-----|--------|-------------------------|-------------|----------------------|-----------------------------------------|
| 1   | 7   | 138437432        | ATP6V0A4 | C   | T      |                         | 52.9        | nonsynonymous SNV    | NM_020632:c.967G>A:p.A323T              |
| 1   | 19  | 16040374         | CYP4F11  | T   | A      |                         | 87          | nonsynonymous SNV    | NM_021187:c.236A>T:p.Q79L               |
| 1   | 3   | 183823156        | HTR3E    | A   | -GCAAG |                         | 50.5        | frameshift deletion  | NM_001256613:c.662_666delGCAAG:p.K222fs |
| 1   | 5   | 38869211         | OSMR     | A   | G      |                         | 37.0        | nonsynonymous SNV    | NM_001168355:c.65A>G:p.Q22R             |
| 1   | 16  | 67695894         | PARD6A   | C   | A      |                         | 41.8        | nonsynonymous SNV    | NM_016948:c.385C>A:p.P129T              |
| 1   | 6   | 150569915        | PPP1R14C | G   | A      |                         | 26.2        | nonsynonymous SNV    | NM_030949:c.457G>A:p.G153S              |
| 1   | 14  | 61186589         | SIX4     | G   | A      |                         | 45.1        | stopgain SNV         | NM_017420: c.1438C>T:p.Q480X            |
| 1   | 15  | 62994266         | TLN2     | C   | G      |                         | 47.8        | nonsynonymous SNV    | NM_015059:c.1772C>G:p.S591C             |
| 1   | 15  | 81627077         | TMC3     | C   | G      | rs376889456             | 35.4        | nonsynonymous SNV    | NM_001080532:c.2443G>C:p. E815Q         |
| 1   | 19  | 4054026          | ZBTB7A   | C   | T      |                         | 75.2        | nonsynonymous SNV    | NM_015898:c.1205G>A:p.R402H             |
| 1   | 19  | 24288837         | ZNF254   | G   | A      |                         | 43.9        | nonsynonymous SNV    | NM_203282:c.126G>A:p.M42I               |
| 2   | 12  | 70724077         | CNOT2    | C   | T      |                         | 44          | nonsynonymous SNV    | NM_014515:c.397C>T:p.P133S              |
| 2   | 1   | 22903142         | EPHA8    | C   | T      |                         | 34          | nonsynonymous SNV    | NM_020526:c.592C>T:p.R198C              |
| 2   | 16  | 30495266         | ITGAL    | C   | T      |                         | 29.7        | nonsynonymous SNV    | NM_002209:c.841C>T:p.R281C              |
| 2   | 4   | 55599321         | KIT      | A   | T      | rs121913507             | 28.3        | nonsynonymous SNV    | NM_000222:c.2447A>T:p.D816V             |
| 2   | 18  | 30321954         | KLHL14   | G   | A      |                         | 45.6        | nonsynonymous SNV    | NM_020805:c.1006C>T:p.R336W             |
| 2   | 5   | 140348603        | PCDHAC2  | G   | T      | position of rs143196630 | 37.2        | nonsynonymous SNV    | NM_018899:c.2252G>T:p.R751M             |
| 2   | 6   | 42890875         | PTCRA    | C   | T      |                         | 40.7        | nonsynonymous SNV    | NM_138296:c.169C>T:p.L57F               |
| 2   | 19  | 46198897         | QPCTL    | C   | T      |                         | 51.3        | nonsynonymous SNV    | NM_017659:c.554C>T:p.T185M              |
| 2   | 6   | 28540575         | SCAND3   | A   | C      |                         | 46.8        | nonsynonymous SNV    | NM_052923:c.3091T>G:p.S1031A            |
| 2   | 3   | 36534709         | STAC     | C   | T      |                         | 29.5        | nonsynonymous SNV    | NM_003149:c.754C>T:p. R252C             |
| 2   | X   | 104464034        | TEX13A   | G   | A      |                         | 44.9        | nonsynonymous SNV    | NM_031274:c.842C>T:p.T281M              |
| 2   | 19  | 4054708          | ZBTB7A   | C   | +G     |                         | 45.7        | frameshift insertion | NM_015898:c.522dupC:p.A175fs            |

**Supplementary Table 2.** Primer sequences for Sanger sequencing of *ZBTB7A* exon 2.

| Region  | PCR-amplification primers |                       | Sequencing primers |                       |
|---------|---------------------------|-----------------------|--------------------|-----------------------|
| Exon2_1 | fwd                       | GGGTGGAACGCTGCTTCT    | fwd                | CTTGTCAGTGGGCACAGGAA  |
|         | rev                       | GTTTCATGGGGTTGCTCTGGA | rev                | CTGAGGATGTCAACCCACGTT |
| Exon2_2 | fwd                       | GCTCATGGACTTCGCCTAC   | fwd                | ACAGCCAACGTGGGTGAC    |
|         | rev                       | GGTAGTAGTCCATGACGCC   | rev                | CTCCCGACAGGAAGCCC     |
| Exon2_3 | fwd                       | CCAGAGCGGGATGAGGAC    | fwd                | ACTCTCCGGGCTTCTGTC    |
|         | rev                       | GTGTGCACGTGCGTGTATG   | rev                | GTATGTGTGCGTCTGCGTG   |

**Supplementary Table 3.** *ZBTB7A* mutations from gene panel\* analysis of 56 AML t(8;21) cases.

| UPN | Chr | Position (hg 19) | Gene   | Ref | Var | Length | Ref Count | Var Count | VarFreq (%) | Type                 | AA Change                                       | Sanger validated |
|-----|-----|------------------|--------|-----|-----|--------|-----------|-----------|-------------|----------------------|-------------------------------------------------|------------------|
| 1   | 19  | 4054026          | ZBTB7A | C   | T   | 1      | 298       | 901       | 75.2        | nonsynonymous SNV    | NM_015898:exon2:c.1205G>A:p.R402H               | Yes              |
| 3   | 19  | 4054027          | ZBTB7A | G   | A   | 1      | 564       | 136       | 19.4        | nonsynonymous SNV    | NM_015898:exon2:c.1204C>T:p.R402C               | Yes              |
| 3   | 19  | 4054708          | ZBTB7A | -   | G   | 1      | 446       | 156       | 25.9        | frameshift insertion | NM_015898:exon2:c.522dupC:p.A175fs              | Yes              |
| 4   | 19  | 4054727          | ZBTB7A | G   | -   | 1      | 2387      | 290       | 10.8        | frameshift deletion  | NM_015898:exon2:c.504delC:p.P168fs              | No               |
| 4   | 19  | 4055082          | ZBTB7A | G   | A   | 1      | 888       | 438       | 33.0        | nonsynonymous SNV    | NM_015898:exon2:c.149C>T:p.S50L                 | Yes              |
| 5   | 19  | 4054141          | ZBTB7A | -   | TTA | 3      | 242       | 89        | 26.9        | stopgain insertion   | NM_015898:exon2:c.1089_1090insTAA:p.V364delinsX | Yes              |
| 5   | 19  | 4055085          | ZBTB7A | C   | T   | 1      | 305       | 211       | 40.9        | nonsynonymous SNV    | NM_015898:exon2:c.146G>A:p.R49H                 | Yes              |
| 6   | 19  | 4054048          | ZBTB7A | C   | A   | 1      | 522       | 77        | 12.9        | nonsynonymous SNV    | NM_015898:exon2:c.1183G>T:p.G395C               | Yes              |
| 7   | 19  | 4054027          | ZBTB7A | G   | A   | 1      | 2129      | 1117      | 34.4        | nonsynonymous SNV    | NM_015898:exon2:c.1204C>T:p.R402C               | Yes              |
| 8   | 19  | 4054708          | ZBTB7A | -   | G   | 1      | 459       | 231       | 33.4        | frameshift insertion | NM_015898:exon2:c.522dupC:p.A175fs              | Yes              |
| 9   | 19  | 4054102          | ZBTB7A | G   | A   | 1      | 235       | 167       | 41.5        | stopgain SNV         | NM_015898:exon2:c.1129C>T:p.R377X               | Yes              |
| 10  | 19  | 4048131          | ZBTB7A | G   | -   | 1      | 328       | 35        | 9.6         | frameshift deletion  | NM_015898:exon3:c.1374delC:p.R458fs             | No               |
| 10  | 19  | 4054708          | ZBTB7A | -   | G   | 1      | 208       | 12        | 5.5         | frameshift insertion | NM_015898:exon2:c.522dupC:p.A175fs              | No               |
| 11  | 19  | 4054994          | ZBTB7A | G   | T   | 1      | 462       | 174       | 27.4        | nonsynonymous SNV    | NM_015898:exon2:c.237C>A:p.F79L                 | Yes              |
| 12  | 19  | 4054708          | ZBTB7A | -   | G   | 1      | 7326      | 552       | 7.0         | frameshift insertion | NM_015898:exon2:c.522dupC:p.A175fs              | Yes              |
| 13  | 19  | 4054977          | ZBTB7A | A   | C   | 1      | 197       | 629       | 76.2        | nonsynonymous SNV    | NM_015898:exon2:c.254T>G:p.L85R                 | Yes              |
| 14  | 19  | 4054708          | ZBTB7A | -   | G   | 1      | 872       | 362       | 29.3        | frameshift insertion | NM_015898:exon2:c.522dupC:p.A175fs              | Yes              |

\*JAK1, NRAS, GATA3, PTEN, SMC3, WT1, SF1, CBL, ETV6, KRAS, PTPN11, FLT3, IDH2, TP53, SRSF2, JAK3, CEBPA, U2AF2, DNMT3A, SF3B1, IDH1, ASXL1, RUNX1, U2AF1, SF3A1, MYD88, GATA2, KIT, TET2, FBXW7, IL7R, NPM1, BRAF, EZH2, RAD21, JAK2, NOTCH1, ZRSR2, BCOR, GATA1, SMC1A, STAG2, PHF6, ZBTB7A, ASXL2, FAT1

**Supplementary Table 4.** Patient characteristics of AML t(8;21) gene panel sequencing cohort.

| Variable                                              | Wild-type <i>ZBTB7A</i> | Mutated <i>ZBTB7A</i> | P value* |
|-------------------------------------------------------|-------------------------|-----------------------|----------|
| No. of patients                                       | 43                      | 13                    |          |
| Median Age, years (range)                             | 55 (23-79)              | 53 (16-66)            | 0.148    |
| Male gender, no. (%)                                  | 29 (67)                 | 10 (77)               | 0.7331   |
| White blood cell count G/l, median (range)            | 9 (1.9-210)             | 8.3 (3.5-245)         | 0.9689   |
| Bone marrow blasts %, median (range)                  | 70 (4-95)               | 55 (14-90)            | 0.1141   |
| French-American-British (FAB) classification, no. (%) | M1: 7 (20)              | M1: 1 (3)             | 0.6593   |
|                                                       | M2: 28 (80)             | M2: 10 (83)           | 1.0000   |
|                                                       |                         | M4: 1 (3)             | 0.2553   |
| Secondary AML (%)                                     | 7                       | 8                     | 1.0000   |
| Allogeneic transplantation, no. (%)                   | 4 (12)                  | 2 (22)                | 0.5928   |
| Complete Remission, no. (%)                           | 18 (55)                 | 6 (67)                | 0.7083   |
| Relapse, no. (%)                                      | 5 (28)                  | 4 (67)                | 0.1501   |
| Deceased, no. (%)                                     | 15 (45)                 | 6 (67)                | 0.4537   |

\*Two-tailed Fisher's exact test was used to compare categorical variables, while Wilcoxon Mann-Whitney U test was applied for continuous variables

**Supplementary Table 5.** *ZBTB7A* expression in molecular and age subgroups of CN-AML.

|                  | All CN-AML<br>N=218                 |                                        |      | CN-AML <60 years<br>N=112           |                                       |     | CN-AML ≥60 years<br>N=106           |                                       |       |
|------------------|-------------------------------------|----------------------------------------|------|-------------------------------------|---------------------------------------|-----|-------------------------------------|---------------------------------------|-------|
|                  | <i>ZBTB7A</i> <sup>Q4</sup><br>N=55 | <i>ZBTB7A</i> <sup>Q1-3</sup><br>N=163 | P    | <i>ZBTB7A</i> <sup>Q4</sup><br>N=37 | <i>ZBTB7A</i> <sup>Q1-3</sup><br>N=75 | P   | <i>ZBTB7A</i> <sup>Q4</sup><br>N=18 | <i>ZBTB7A</i> <sup>Q1-3</sup><br>N=88 | P     |
| <i>FLT3</i> -ITD | 13/54                               | 70/163                                 | .015 | 11/36                               | 36/75                                 | .10 | 2/18                                | 34/88                                 | .03   |
| <i>NPM1</i>      | 31/53                               | 83/158                                 | .52  | 20/36                               | 47/74                                 | .53 | 11/17                               | 36/84                                 | .11   |
| LMR              | 24/53                               | 34/159                                 | .001 | 14/36                               | 20/75                                 | .20 | 10/17                               | 14/84                                 | <.001 |

ITD, Internal tandem duplication; LMR, low molecular risk genotype; mutated *NPM1* without *FLT3*-ITD, Q4, quartile of patients with highest expression levels of *ZBTB7A*, Q1-3, quartiles of patients with lower expression levels of *ZBTB7A*. P Values were calculated by two-tailed Fisher's exact test.
